# Supplementary material
Source: publisher site journal article supplement (https://www.dovepress.com/get_supplementary_file.php?f=492356.docx)
Supplement: Supplementary file 1 [file get_supplementary_file.php]

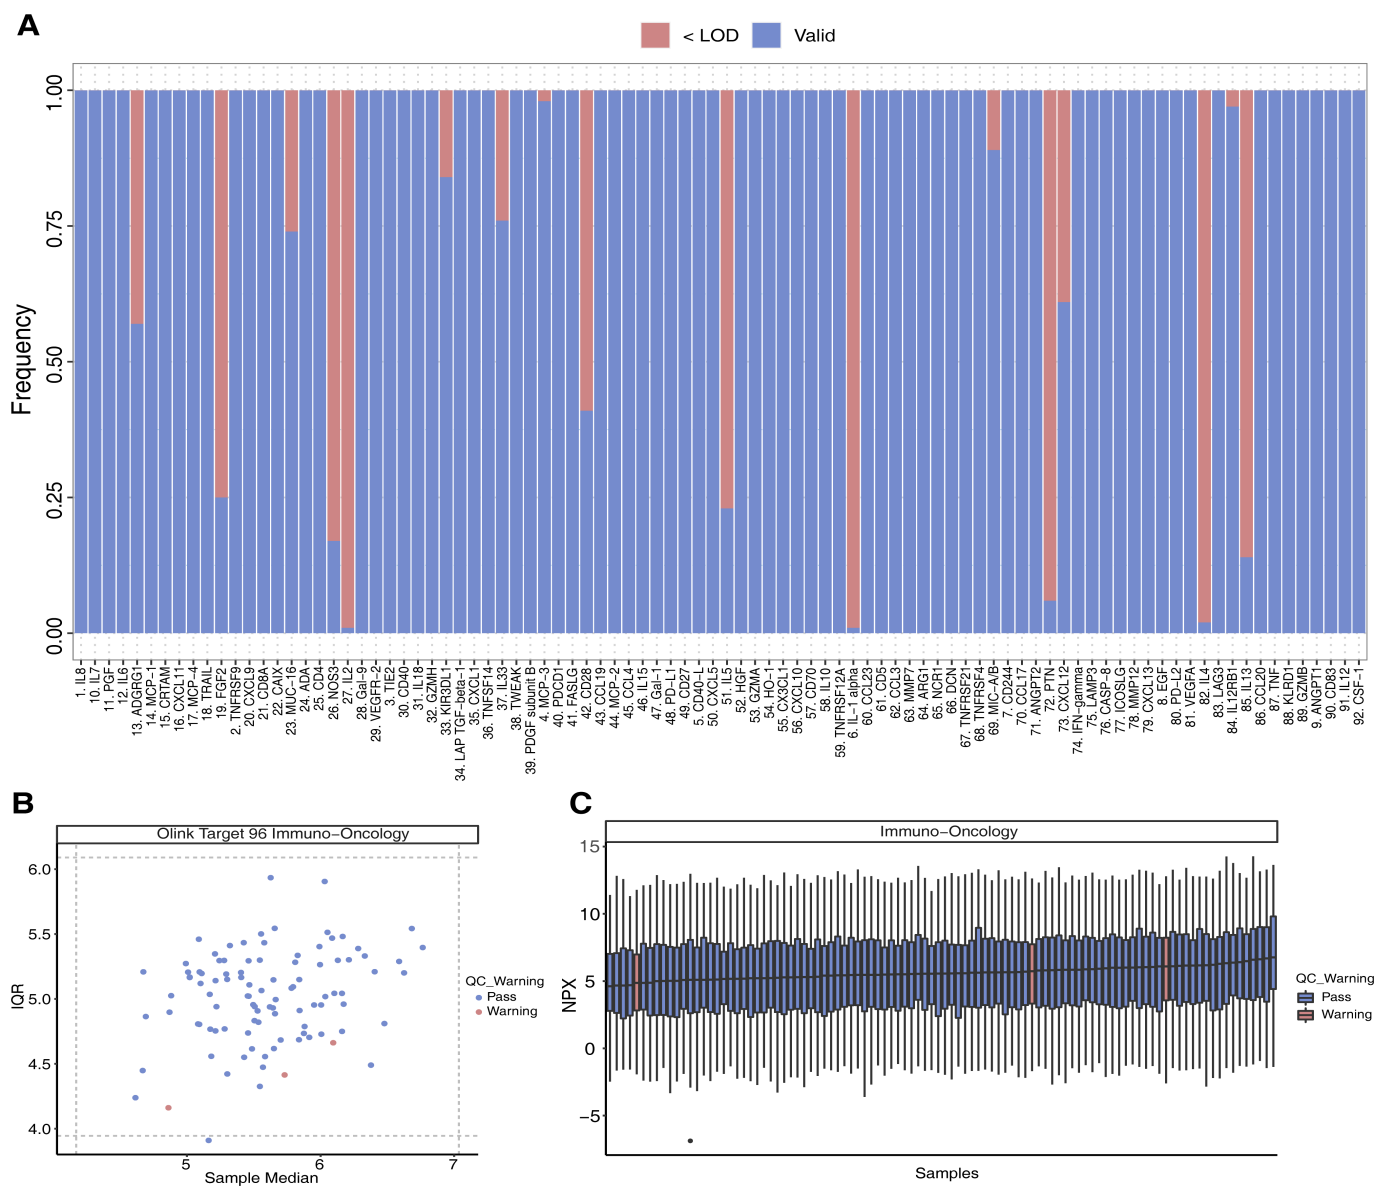


**Supplementary Figure 1, Quality control of sample data**

(A) Show the proportion of data below LOD in all samples in the form of bar chart, where blue represents the part of data above LOD and red represents the part of data below LOD. (B) Is the Interquartile Range (Interquartile Range, IQR are much less) as a result, compared with the standard deviation to estimate the discrete degree, IQR are much less data can get rid of the influence of extreme value, used to estimate the discrete degree will be more conservative. (C) The distribution of NPX values of all samples in the selected Panel is shown in a boxplot, where the samples of QC warning are marked in different colors.


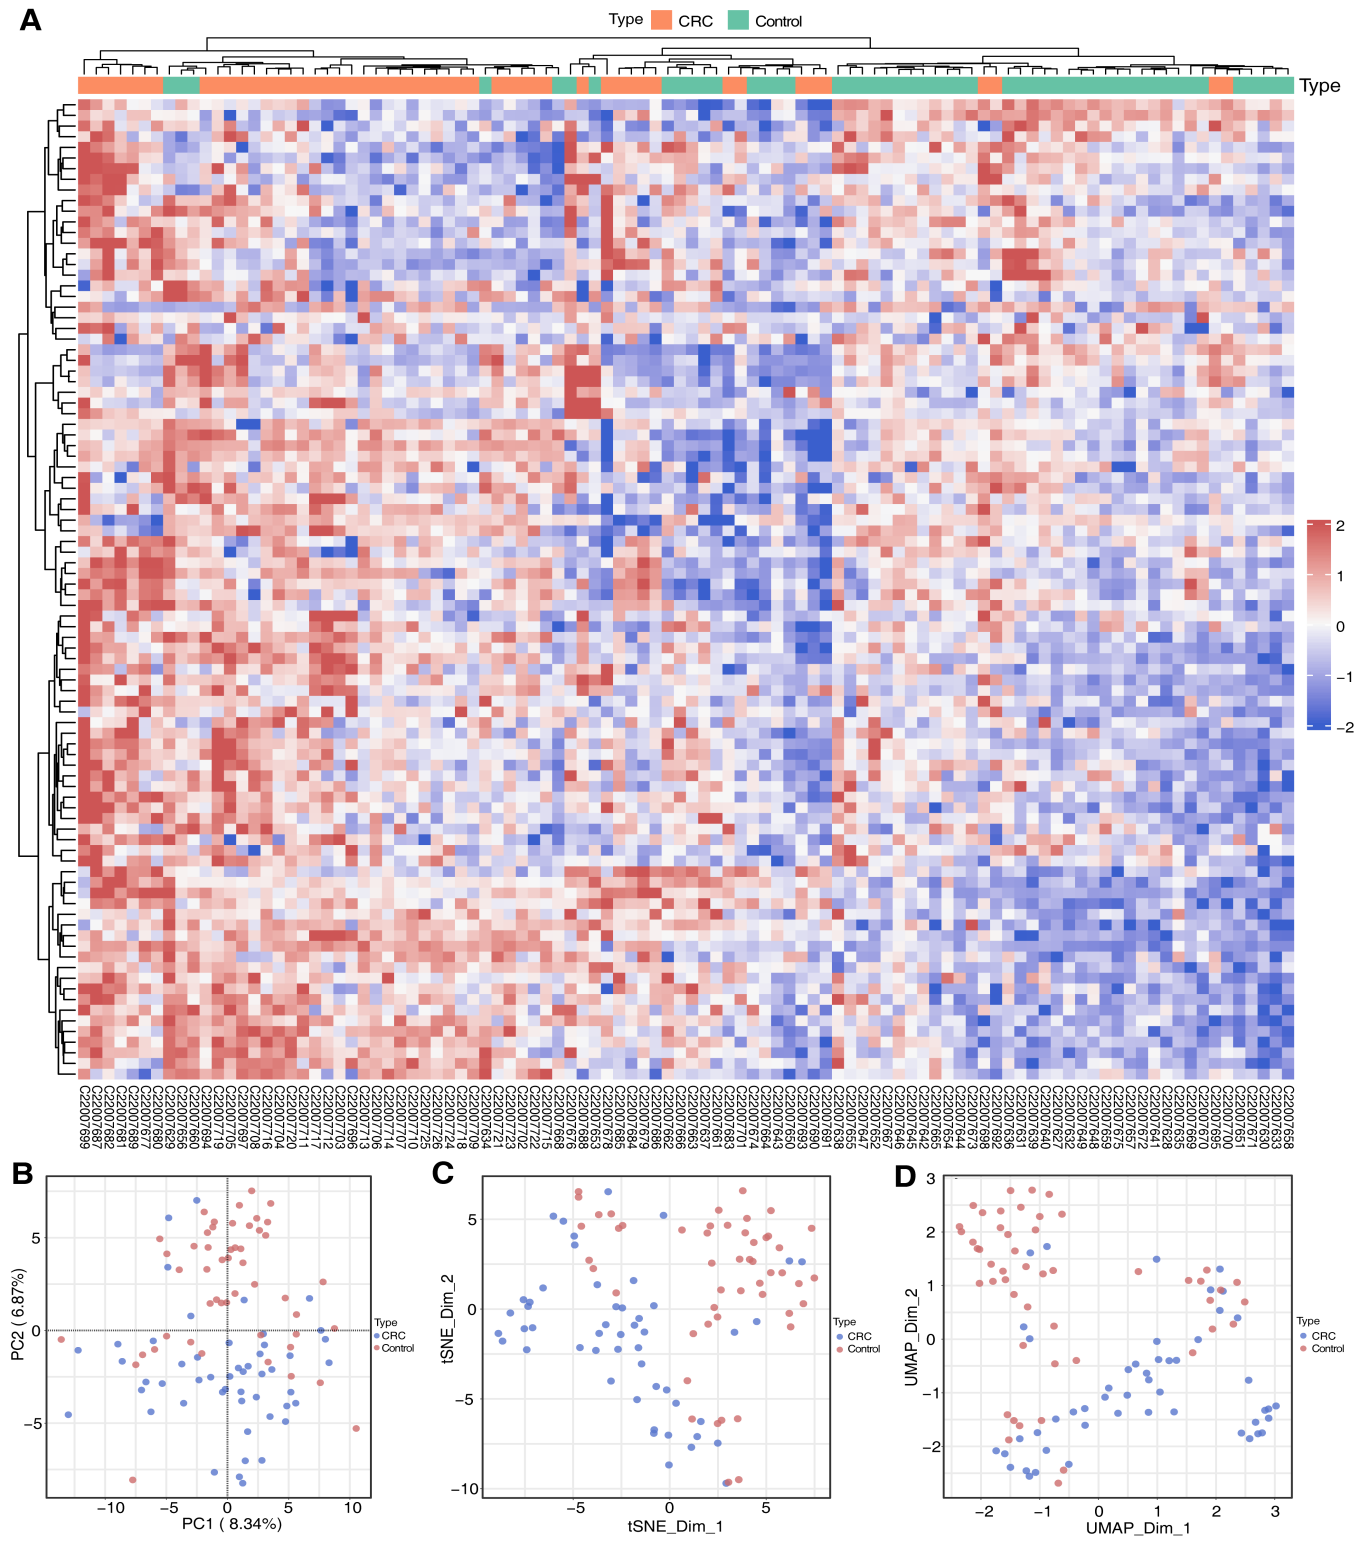


**Supplementary Figure 2. Correlation Analysis between Samples**

(A) Heat map of protein expression was displayed according to sample grouping (B-D) PCA, tSNE and UMAP were used to analyze the data and explore the relationship between each sample. In the PCA dimensionality reduction analysis image, the horizontal axis represents the first principal component, and the vertical axis is the second principal component. In tSNE and UMAP two-dimensional image, the horizontal axis and vertical axis represents the two-dimensional axis after the dimension, each point corresponds to a sample. The diagram shows different ways of coloring of two-dimensional images, and illustrations are a sample group of color information. Blue stands for colorectal cancer samples, red representative samples of healthy controls.


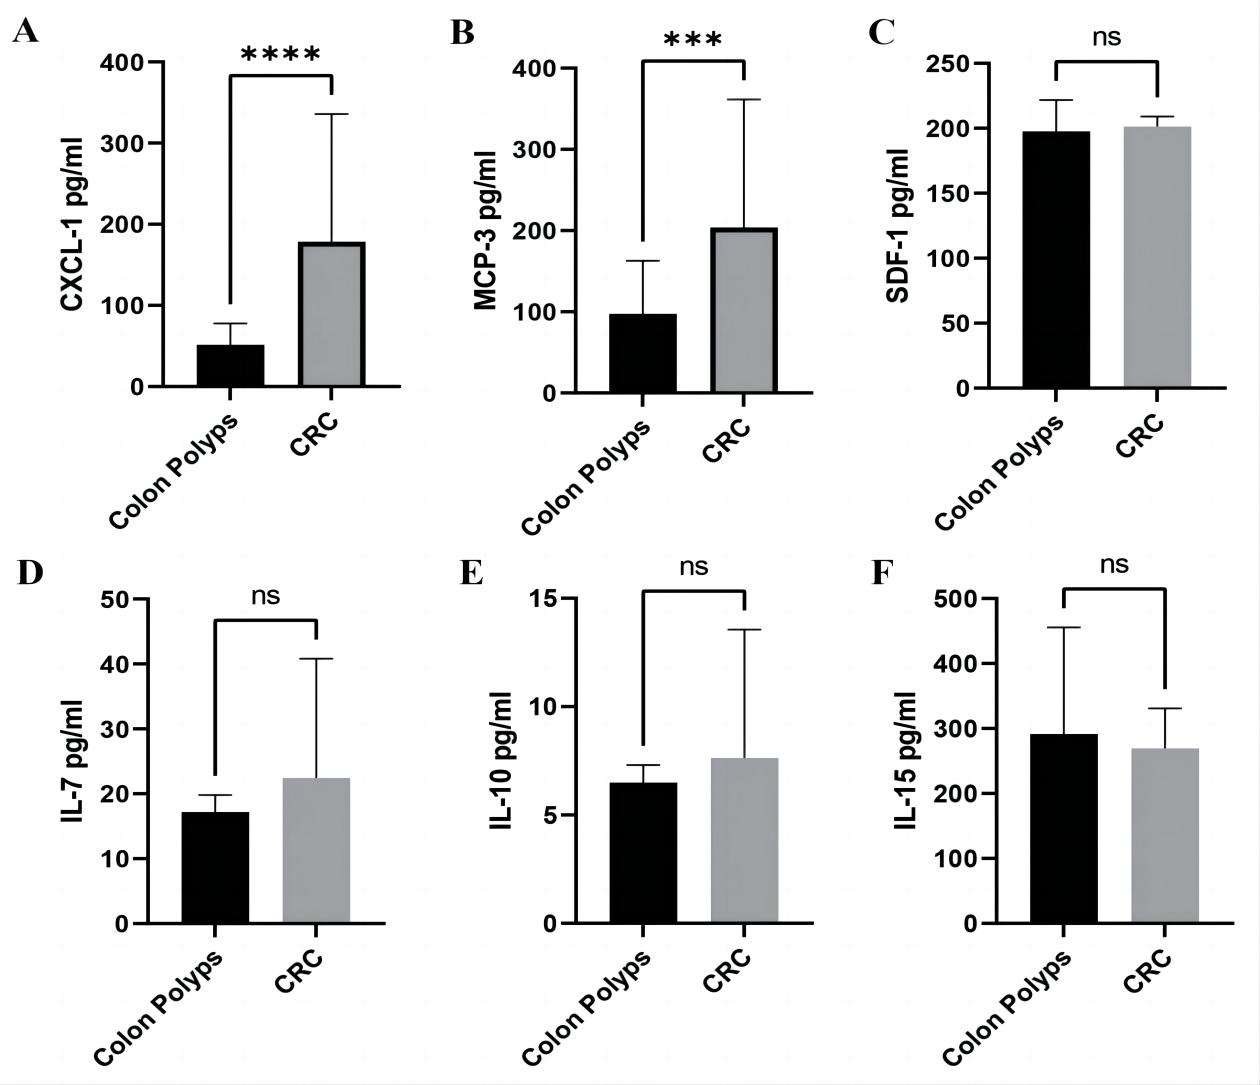


**Supplementary Figure 3. Verify the relative content of IL 7, CXCL12, IL 10, IL 15, CXCL 1 and MCP-3 in the CRC group and the control group use ELISA assay.**

(A-F) the relative content of IL 7, CXCL12, IL 10, IL 15, CXCL 1 and MCP-3 in the CRC group and the control group,*****P*<0.05,****P*<0.01.

|  | control | CRC | *P* value |
| --- | --- | --- | --- |
| N | 51 | 47 |  |
| Age | 55.84±13.08 | 63.68±13.82 | 0.896 |
| AFP | 2.70±1.08 | 2.91±1.69 | 0.010 |
| CEA | 2.09±1.09 | 27.76±88.34 | 0.001 |
| CA19-9 | 10.71±5.75 | 51.26±200.09 | 0.015 |
| CA72-4 | 2.27±1.83 | 2.67±4.70 | 0.154 |

**Supplementary Table 1. General information of the patients in discover cohorts**

**Supplementary Table 2. General information of the patients in validation cohorts**

|  | control | CRC | *P* value |
| --- | --- | --- | --- |
| N | 31 | 31 |  |
| Age | 57.03±12.08 | 68.03±10.59 | 0.268 |
| AFP | 2.86±1.35 | 2.87±1.64 | 0.002 |
| CEA | 2.76±2.79 | 19.88±34.13 | <0.0001 |
| CA19-9 | 9.62±5.04 | 29.46±44.52 | <0.0001 |
| CA72-4 | 7.98±18.26 | 1.932±0.78 | <0.0001 |

**Supplementary Table 3. Tumor-immune-related factors**

| Name | Abbreviation | Number |
| --- | --- | --- |
| Adenosine deaminase | (ADA) | P00813 |
| Adhesion G-protein coupled receptor G1 | (ADGRG1) | Q9Y653 |
| Angiopoietin-1 | (ANGPT1) | Q15389 |
| Angiopoietin-1 receptor | (TIE2) | Q02763 |
| Angiopoietin-2 | (ANGPT2) | O15123 |
| Arginase-1 | (ARG1) | P05089 |
| Carbonic anhydrase 9 | (CAIX) | Q16790 |
| Caspase-8 | (CASP-8) | Q14790 |
| C-C motif chemokine 13 | (MCP-4) | Q99616 |
| C-C motif chemokine 17 | (CCL17) | Q92583 |
| C-C motif chemokine 19 | (CCL19) | Q99731 |
| C-C motif chemokine 2 | (MCP-1) | P13500 |
| C-C motif chemokine 20 | (CCL20) | P78556 |
| C-C motif chemokine 23 | (CCL23) | P55773 |
| C-C motif chemokine 3 | (CCL3) | P10147 |
| C-C motif chemokine 4 | (CCL4) | P13236 |
| C-C motif chemokine 7 | (MCP-3) | P80098 |
| C-C motif chemokine 8 | (MCP-2) | P80075 |
| CD27 antigen | (CD27) | P26842 |
| CD40 ligand | (CD40-L) | P29965 |
| CD40L receptor | (CD40) | P25942 |
| CD70 antigen | (CD70) | P32970 |
| CD83 antigen | (CD83) | Q01151 |
| C-X-C motif chemokine 1 | (CXCL1) | P09341 |
| C-X-C motif chemokine 10 | (CXCL10) | P02778 |
| C-X-C motif chemokine 11 | (CXCL11) | O14625 |
| C-X-C motif chemokine 13 | (CXCL13) | O43927 |
| C-X-C motif chemokine 5 | (CXCL5) | P42830 |
| C-X-C motif chemokine 9 | (CXCL9) | Q07325 |
| Cytotoxic and regulatory T-cell molecule | (CRTAM) | O95727 |
| Macrophage colony-stimulating factor 1 | (CSF-1) | P09603 |
| Macrophage metalloproteinase-12 | (MMP12) | P39900 |
| Matrix metalloproteinase-7 | (MMP7) | P09237 |
| MHC class I polypeptide-related sequence A/B | (MIC-A/B) | Q29983,Q29980 |
| Mucin-16 | (MUC-16) | Q8WXI7 |
| Natural cytotoxicity triggering receptor | (NCR1) | O76036 |
| Natural killer cell receptor 2B4 | (CD244) | Q9BZW8 |
| Natural killer cells antigen CD94 | (KLRD1) | Q13241 |
| Nitric oxide synthase, endothelial | (NOS3) | P29474 |
| Placenta growth factor | (PGF) | P49763 |
| Platelet-derived growth factor subunit B | (PDGF subunit B) | P01127 |
| Pleiotrophin | (PTN) | P21246 |
| Pro-epidermal growth factor | (EGF) | P01133 |
| Programmed cell death 1 ligand 1 | (PD-L1) | Q9NZQ7 |
| Programmed cell death 1 ligand 2 | (PD-L2) | Q9BQ51 |
| Programmed cell death protein 1 | (PDCD1) | Q15116 |
| Decorin | (DCN) | P07585 |
| Fibroblast growth factor 2 | (FGF2) | P090 |
| Fractalkine | (CX3CL1) | P78423 |
| Galectin-1 | (Gal-1) | P09382 |
| Galectin-9 | (Gal-9) | O00182 |
| Granzyme A | (GZMA) | P12544 |
| Granzyme B | (GZMB) | P10144 |
| Granzyme H | (GZMH) | P20718 |
| Heme oxygenase 1 | (HO-1) | P09601 |
| Hepatocyte growth factor | (HGF) | P14210 |
| ICOS ligand | (ICOSLG) | O75144 |
| Interferon gamma | (IFN-gamma) | P01579 |
| Interleukin-1 alpha | (IL-1 alpha) | P01583 |
| Interleukin-10 | (IL10) | P22301 |
| Interleukin-12 | (IL12) | P29459,P29460 |
| Interleukin-12 receptor subunit beta-1 | (IL12RB1) | P42701 |
| Interleukin-13 | (IL13) | P35225 |
| Interleukin-15 | (IL15) | P40933 |
| Interleukin-18 | (IL18) | Q14116 |
| Interleukin-2 | (IL2) | P60568 |
| Interleukin-33 | (IL33) | O95760 |
| Interleukin-4 | (IL4) | P05112 |
| Interleukin-5 | (IL5) | P05113 |
| Interleukin-6 | (IL6) | P05231 |
| Interleukin-7 | (IL7) | P13232 |
| Interleukin-8 | (IL8) | P10145 |
| Killer cell immunoglobulin-like receptor 3DL1 | (KIR3DL1) | P43629 |
| Latency-associated peptide transforming growth factor beta-1 | (LAP TGF-beta-1) | P01137 |
| Lymphocyte activation gene 3 protein | (LAG3) | P18627 |
| Lysosome-associated membrane glycoprotein 3 | (LAMP3) | Q9UQV4 |
| Stromal cell-derived factor 1 | (CXCL12) | P48061 |
| T-cell surface glycoprotein CD4 | (CD4) | P01730 |
| T-cell surface glycoprotein CD5 | (CD5) | P06127 |
| T-cell surface glycoprotein CD8 alpha chain | (CD8A) | P01732 |
| T-cell-specific surface glycoprotein CD28 | (CD28) | P10747 |
| TNF-related apoptosis-inducing ligand | (TRAIL) | P50591 |
| Tumor necrosis factor | (TNF) | P01375 |
| Tumor necrosis factor ligand superfamily member 12 | (TWEAK) | O43508 |
| Tumor necrosis factor ligand superfamily member 14 | (TNFSF14) | O43557 |
| Tumor necrosis factor ligand superfamily member 6 | (FASLG) | P48023 |
| Tumor necrosis factor receptor superfamily member 12A | (TNFRSF12A) | Q9NP84 |
| Tumor necrosis factor receptor superfamily member 21 | (TNFRSF21) | O75509 |
| Tumor necrosis factor receptor superfamily member 4 | (TNFRSF4) | P43489 |
| Tumor necrosis factor receptor superfamily member 9 | (TNFRSF9) | Q07011 |
| Vascular endothelial growth factor A | (VEGFA) | P15692 |
| Vascular endothelial growth factor receptor 2 | (VEGFR-2) | P35968 |

|  | AUC | Sensitivity | Specificity |
| --- | --- | --- | --- |
| IL7 | 0.8690 | 78.72 | 90.20 |
| IL10 | 0.7334 | 82.98 | 60.78 |
| IL15 | 0.8444 | 74.47 | 82.35 |
| CXCL1 | 0.7778 | 80.85 | 72.55 |
| CXCL12 | 0.6567 | 44.68 | 82.35 |
| MCP-3 | 0.6366 | 59.57 | 80.39 |
| CEA | 0.7651 | 63.83 | 82.35 |
| CA19-9 | 0.6045 | 34.04 | 88.24 |

**Supplementary Table 4. Sensitivity and specificity analysis**

**Supplementary Table 5. Relationship between IL15 expression and the clinical characteristics of**

**CRC patients**

|  | Patients (n) | Mean±standard deviation | *P*-value |
| --- | --- | --- | --- |
| Sex |  |  | 0.8523 |
| male | 30 | 4.87±0.67 |  |
| female | 17 | 4.75±0.41 |  |
| Age (years) |  |  | 0.4626 |
| ≥60 | 32 | 4.86±0.57 |  |
| <60 | 15 | 4.76±0.65 |  |
| Tumor size (cm) |  |  | 0.0004 |
| ≥4 | 31 | 4.97±0.56 |  |
| <4 | 11 | 4.31±0.46 |  |
| Degree of infiltration |  |  | 0.2248 |
| T1 | 2 | 4.28±0.07 |  |
| T2 | 5 | 4.91±0.46 |  |
| T3 | 21 | 4.80±0.66 |  |
| T4 | 10 | 4.97±0.62 |  |
| Lymphatic metastasis |  |  | 0.9779 |
| Yes | 19 | 4.81±0.72 |  |
| No | 22 | 4.81±0.50 |  |
| Distant metastasis |  |  | 0.1747 |
| Yes | 6 | 5.03±0.85 |  |
| No | 30 | 4.68±0.49 |  |
| TNM |  |  | 0.1276 |
| I | 10 | 4.84±0.64 |  |
| II | 12 | 4.72±0.41 |  |
| III | 20 | 4.74±0.58 |  |
| IV | 5 | 5.41±0.71 |  |
| Differentiation |  |  | 0.9756 |
| High | 0 | 0 |  |
| Moderate | 39 | 4.82±0.61 |  |
| Poor | 2 | 4.77±0.12 |  |
| Location |  |  | 0.4483 |
| rectum | 20 | 4.83±0.58 |  |
| colon | 26 | 4.81±0.62 |  |

**Supplementary** **Table 6. Relationship between MCP-3 expression and the clinical characteristics of CRC patients**

|  | Patients (n) | Mean±standard deviation | *P*-value |
| --- | --- | --- | --- |
| Sex |  |  | 0.5176 |
| male | 30 | 3.33±2.48 |  |
| female | 17 | 2.75±2.08 |  |
| Age (years) |  |  | 0.4626 |
| ≥60 | 32 | 2.94±2.17 |  |
| <60 | 15 | 3.49±2.70 |  |
| Tumor size (cm) |  |  | 0.4123 |
| ≥4 | 31 | 3.18±2.42 |  |
| <4 | 11 | 2.44±1.62 |  |
| Degree of infiltration |  |  | 0.4184 |
| T1 | 2 | 1.37±0.37 |  |
| T2 | 5 | 2.17±1.00 |  |
| T3 | 21 | 3.31±2.48 |  |
| T4 | 10 | 2.91±2.05 |  |
| Lymphatic metastasis |  |  | 0.2072 |
| Yes | 19 | 3.51±2.69 |  |
| No | 22 | 2.37±1.34 |  |
| Distant metastasis |  |  | 0.0465 |
| Yes | 6 | 3.79±2.30 |  |
| No | 30 | 2.70±2.19 |  |
| TNM |  |  | 0.0496 |
| I | 10 | 2.16±1.47 |  |
| II | 12 | 2.22±1.06 |  |
| III | 20 | 3.69±2.85 |  |
| IV | 5 | 4.92±2.47 |  |
| Differentiation |  |  | 0.1756 |
| High | 0 | 0 |  |
| Moderate | 39 | 3.05±2.29 |  |
| Poor | 2 | 1.31±0.59 |  |
| Location |  |  | 0.9738 |
| rectum | 20 | 3.03±2.16 |  |
| colon | 26 | 3.00±2.35 |  |

**Supplementary Table 7. Relationship between CXCL1 expression and the clinical characteristics of CRC patients**

|  | Patients (n) | Mean±standard deviation | *P*-value |
| --- | --- | --- | --- |
| Sex |  |  | 0.3419 |
| male | 30 | 9.55±1.02 |  |
| female | 17 | 9.42±0.91 |  |
| Age (years) |  |  | 0.6778 |
| ≥60 | 32 | 0.16±0.20 |  |
| <60 | 15 | 0.25±0.36 |  |
| Tumor size (cm) |  |  | 0.332 |
| ≥4 | 31 | 9.60±0.92 |  |
| <4 | 11 | 9.26±1.22 |  |
| Degree of infiltration |  |  | 0.29 |
| T1 | 2 | 9.68±1.01 |  |
| T2 | 5 | 10.22±0.91 |  |
| T3 | 21 | 9.36±0.80 |  |
| T4 | 10 | 9.71±1.01 |  |
| Lymphatic metastasis |  |  | 0.7942 |
| Yes | 19 | 9.50±0.87 |  |
| No | 22 | 9.57±0.93 |  |
| Distant metastasis |  |  | 0.5535 |
| Yes | 6 | 9.31±0.92 |  |
| No | 30 | 9.56±0.94 |  |
| TNM |  |  | 0.8598 |
| I | 10 | 9.61±1.23 |  |
| II | 12 | 9.40±0.98 |  |
| III | 20 | 9.45±0.87 |  |
| IV | 5 | 9.81±1.09 |  |
| Differentiation |  |  | 0.322 |
| High | 0 | 0 |  |
| Moderate | 39 | 9.50±0.99 |  |
| Poor | 2 | 10.32±1.19 |  |
| Location |  |  | 0.0909 |
| rectum | 20 | 9.24±0.80 |  |
| colon | 26 | 9.74±1.08 |  |

**Supplementary Table 8. Relationship between CXCL12 expression and the clinical characteristics of CRC patients**

|  | Patients (n) | Mean±standard deviation | *P*-value |
| --- | --- | --- | --- |
| Sex |  |  | 0.1932 |
| male | 30 | 0.46±0.61 |  |
| female | 17 | 0.20±0.75 |  |
| Age (years) |  |  | 0.5634 |
| ≥60 | 32 | 0.41±0.73 |  |
| <60 | 15 | 0.28±0.53 |  |
| Tumor size (cm) |  |  | 0.1816 |
| ≥4 | 31 | 0.35±0.69 |  |
| <4 | 11 | 0.67±0.57 |  |
| Degree of infiltration |  |  | 0.0716 |
| T1 | 2 | 1.15±0.10 |  |
| T2 | 5 | 0.77±0.61 |  |
| T3 | 21 | 0.22±0.58 |  |
| T4 | 10 | 0.70±0.81 |  |
| Lymphatic metastasis |  |  | 0.5698 |
| Yes | 19 | 0.49±0.71 |  |
| No | 22 | 0.37±0.66 |  |
| Distant metastasis |  |  | 0.8182 |
| Yes | 6 | 0.51±0.72 |  |
| No | 30 | 0.43±0.70 |  |
| TNM |  |  | 0.1392 |
| I | 10 | 0.73±0.55 |  |
| II | 12 | 0.25±0.58 |  |
| III | 20 | 0.37±0.76 |  |
| IV | 5 | -0.07±0.38 |  |
| Differentiation |  |  | 0.2951 |
| High | 0 | 0 |  |
| Moderate | 39 | 0.42±0.67 |  |
| Poor | 2 | 0.98±0.74 |  |
| Location |  |  | 0.1969 |
| rectum | 20 | 0.24±0.50 |  |
| colon | 26 | 0.50±0.76 |  |

**Supplementary** **Table 9. Relationship between IL7 expression and the clinical characteristics of CRC patients**

|  | Patients (n) | Mean±standard deviation | *P*-value |
| --- | --- | --- | --- |
| Sex |  |  | 0.2302 |
| male | 30 | 5.33±1.11 |  |
| female | 17 | 5.44±1.33 |  |
| Age (years) |  |  | 0.1692 |
| ≥60 | 32 | 5.54±1.15 |  |
| <60 | 15 | 5.00±1.21 |  |
| Tumor size (cm) |  |  | 0.0113 |
| ≥4 | 31 | 5.64±0.96 |  |
| <4 | 11 | 4.53±1.43 |  |
| Degree of infiltration |  |  | 0.2136 |
| T1 | 2 | 4.74±0.74 |  |
| T2 | 5 | 5.48±0.52 |  |
| T3 | 21 | 5.36±1.26 |  |
| T4 | 10 | 5.90±0.81 |  |
| Lymphatic metastasis |  |  | 0.4763 |
| Yes | 19 | 5.27±1.27 |  |
| No | 22 | 5.60±1.04 |  |
| Distant metastasis |  |  | 0.6741 |
| Yes | 6 | 5.59±0.99 |  |
| No | 30 | 5.36±1.24 |  |
| TNM |  |  | 0.2571 |
| I | 10 | 5.28±1.15 |  |
| II | 12 | 5.71±1.31 |  |
| III | 20 | 5.15±1.25 |  |
| IV | 5 | 5.56±0.46 |  |
| Differentiation |  |  | 0.2195 |
| High | 0 | 0 |  |
| Moderate | 39 | 5.36±1.11 |  |
| Poor | 2 | 6.51±0.77 |  |
| Location |  |  | 0.9975 |
| rectum | 20 | 5.34±1.24 |  |
| colon | 26 | 5.34±1.16 |  |

**Supplementary** **Table 10. Relationship between IL10 expression and the clinical characteristics of CRC patients**

|  | Patients (n) | Mean±standard deviation | *P*-value |
| --- | --- | --- | --- |
| Sex |  |  | 0.3008 |
| male | 30 | 3.25±1.06 |  |
| female | 17 | 2.94±0.83 |  |
| Age (years) |  |  | 0.9384 |
| ≥60 | 32 | 3.13±0.95 |  |
| <60 | 15 | 3.15±1.09 |  |
| Tumor size (cm) |  |  | 0.1207 |
| ≥4 | 31 | 3.25±1.03 |  |
| <4 | 11 | 2.70±0.91 |  |
| Degree of infiltration |  |  | 0.105 |
| T1 | 2 | 1.80±0.09 |  |
| T2 | 5 | 3.34±0.85 |  |
| T3 | 21 | 3.14±0.97 |  |
| T4 | 10 | 3.11±1.00 |  |
| Lymphatic metastasis |  |  | 0.8769 |
| Yes | 19 | 3.01±1.01 |  |
| No | 22 | 3.06±0.95 |  |
| Distant metastasis |  |  | 0.2085 |
| Yes | 6 | 3.42±1.14 |  |
| No | 30 | 2.89±0.90 |  |
| TNM |  |  | 0.4767 |
| I | 10 | 3.09±1.03 |  |
| II | 12 | 2.99±0.91 |  |
| III | 20 | 3.09±0.99 |  |
| IV | 5 | 3.79±1.12 |  |
| Differentiation |  |  | 0.7463 |
| High | 0 | 0 |  |
| Moderate | 39 | 3.16±1.02 |  |
| Poor | 2 | 2.74±0.47 |  |
| Location |  |  | 0.0617 |
| rectum | 20 | 2.80±0.75 |  |
| colon | 26 | 3.34±1.07 |  |
